# Supplementary material
Source: publisher figshare collection journal article supplement (https://acs.figshare.com/ndownloader/files/4155157)
Supplement: Supplementary file 1 [file 4155157]

## Supplemental Materials

### **Strong metal-support interactions between gold nanoparticles and ZnO nanorods in CO oxidation**

Xiaoyan Liu,<sup>a</sup> Ming-Han Liu,<sup>a</sup> Yi-Chia Luo,<sup>a</sup> Chung-Yuan Mou,<sup>\*,a</sup> Shawn  
D. Lin,<sup>b</sup> Hongkui Cheng,<sup>b</sup> Jin-Ming Chen,<sup>c</sup> Jyh-Fu Lee<sup>c</sup> and Tien-Sung  
Lin<sup>d</sup>

<sup>a</sup>Department of Chemistry, National Taiwan University, Taipei 10617, Taiwan;

<sup>b</sup>Department of Chemical Engineering, National Taiwan University of Science and  
Technology, Taipei 106, Taiwan;

<sup>c</sup>National Synchrotron Radiation Research Center, Hsinchu 30076, Taiwan;

<sup>d</sup>Department of Chemistry, Washington University in St. Louis, St. Louis, MO 63130, USA.

Corresponding author: Chung-Yuan Mou

e-mail: [cymou@ntu.edu.tw](mailto:cymou@ntu.edu.tw)

**Chemicals:**

Zinc nitrate hexahydrate ( $\text{Zn}(\text{NO}_3)_2 \cdot 6\text{H}_2\text{O}$ , 98%), hexadecyltrimethylammonium bromide (CTABr, 99+%), hydrogen tetrachloroaurate(III) trihydrate ( $\text{HAuCl}_4 \cdot 3\text{H}_2\text{O}$ , for analysis ACS) and ethylenediamine ( $\text{C}_2\text{H}_4(\text{NH}_2)_2$ , EDA, 99%) were purchased from Acrös. Sodium hydroxide pellets (NaOH) and ethanol (EtOH, 99.9%) were purchased from J. T. Baker. Sodium borohydride ( $\text{NaBH}_4$ , 98%) and sodium carbonate ( $\text{Na}_2\text{CO}_3$ , anhydrous) were bought from Alfa and OSAKA, respectively. All chemicals were used without further purifications.

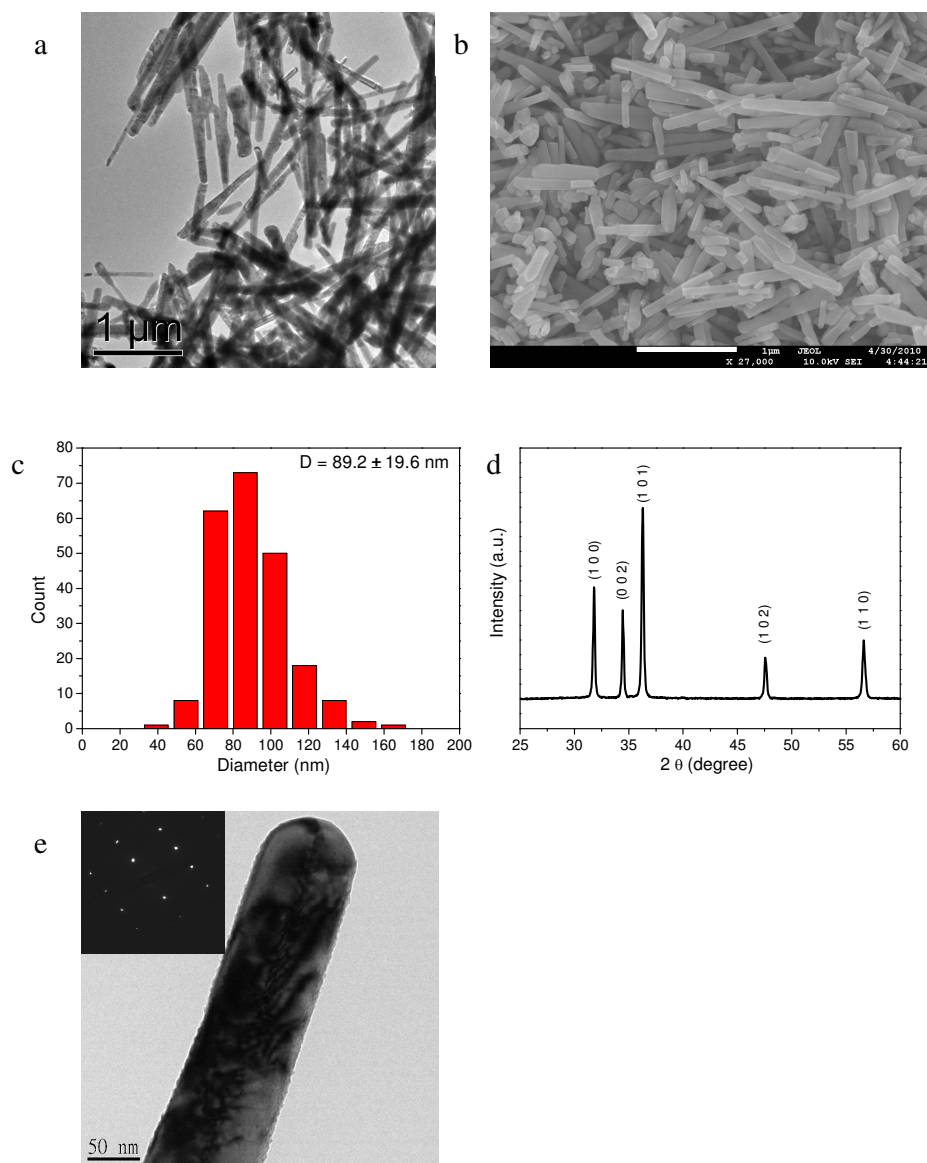

**Figure S1** Basic nature of the ZnO nanorods: TEM image (a); SEM image (b); diameter distribution determined by the SEM images (c); XRD pattern (d); selected area electron diffraction patterns from an arbitrarily selected single ZnO nanorod (e).

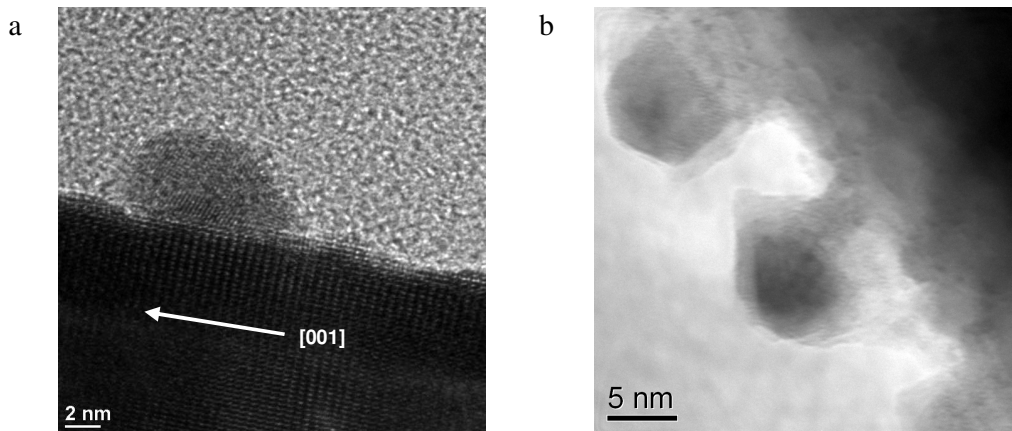

**Figure S2** HRTEM images of Au/ZnO-nanorod pretreated at 200 °C (a) and 300 °C (b) under oxygen atmosphere, respectively.

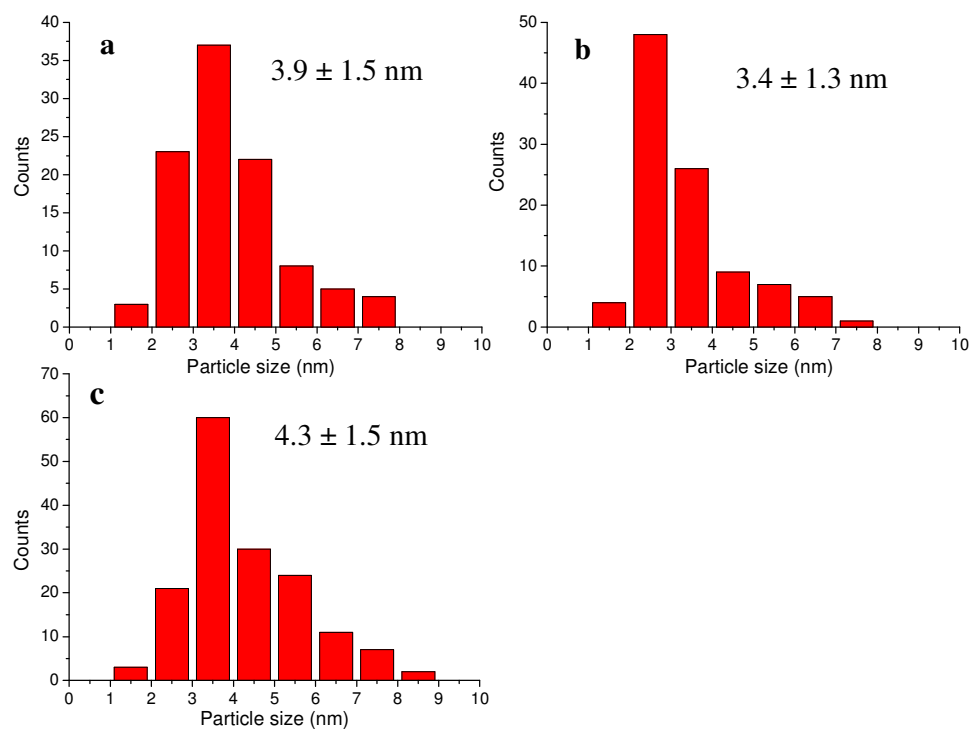

**Figure S3** Size distribution of gold nanoparticles supported on ZnO nanorods pretreated under oxygen atmosphere at 200 °C (a), 300 °C (b) and followed by further pretreatment under hydrogen gas flow at 300 °C (c).

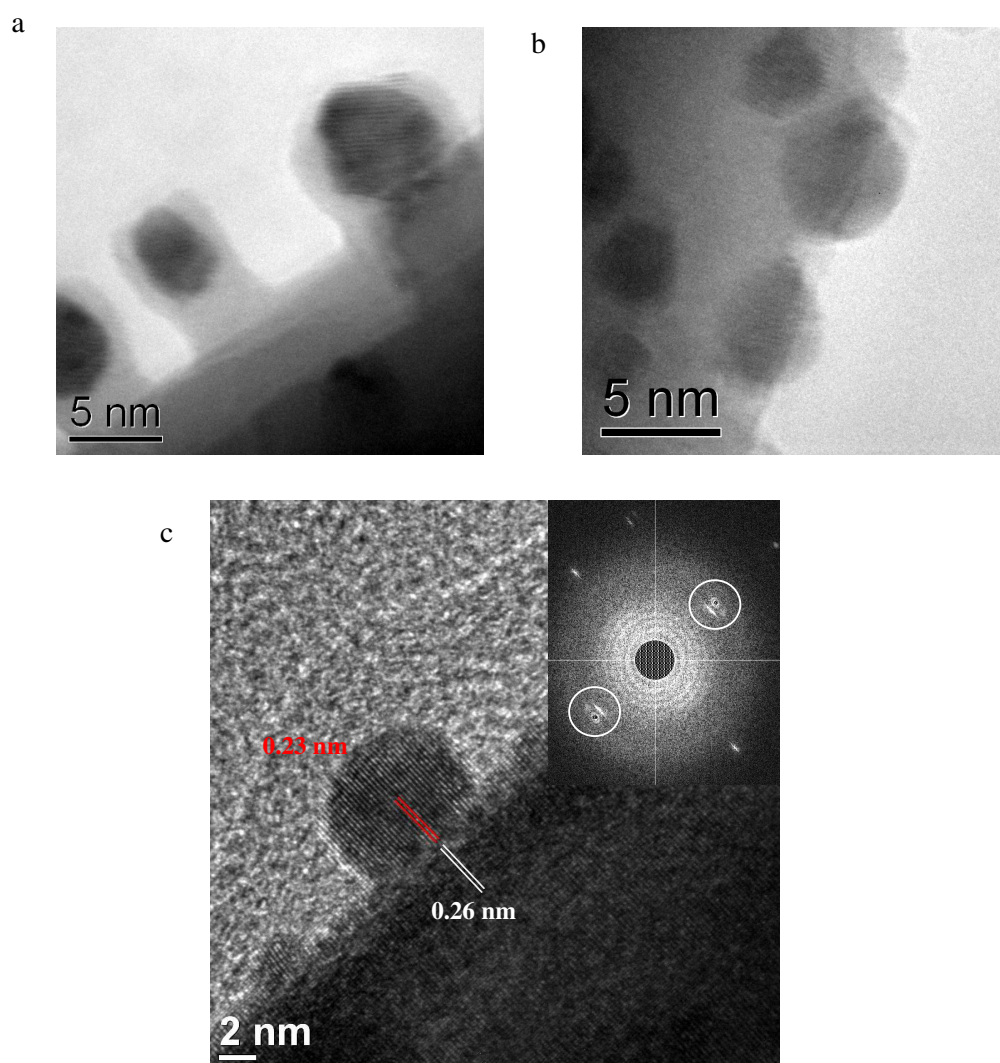

**Figure S4** HRTEM images of Au/ZnO-nanorod pretreated at 300 °C in H<sub>2</sub> (99.999% H<sub>2</sub>, flow rate: 30 mL•min<sup>-1</sup>).

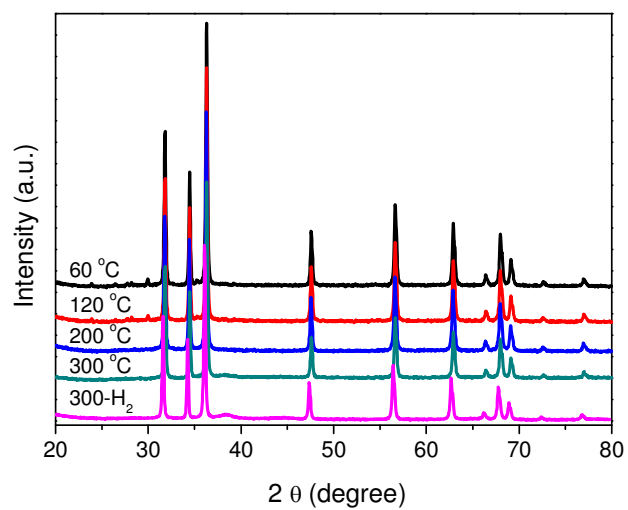

**Figure S5** XRD patterns of Au/ZnO-nanorods pretreated under oxygen atmosphere at 60 °C, 120 °C, 200 °C, 300 °C and followed by further pretreatment under hydrogen gas flow at 300 °C.

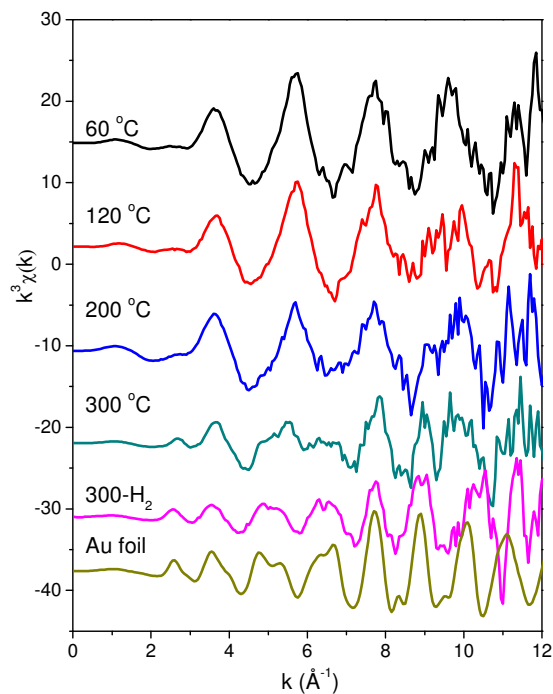

**Figure S6** The  $k^3$ -weighted EXAFS spectra at Au  $L_{III}$ -edge for 20Au/ZnO-nanorods pretreated under oxygen atmosphere at 60 °C, 120 °C, 200 °C, 300 °C and followed by further pretreatment under hydrogen gas flow at 300 °C. The noise level ratio increased when  $k > \sim 11.0 \text{ \AA}^{-1}$ . Therefore,  $\Delta k = 3.1 - 11.1 \text{ \AA}^{-1}$  was used for Au foil and 20Au/ZnO-nanorod pretreated under  $O_2$  atmosphere at various temperatures, while  $\Delta k = 2.9 - 10.8 \text{ \AA}^{-1}$  was used for 20Au/ZnO-nanorod pretreated under  $H_2$  atmosphere at 300 °C.

**Table S1** XPS analysis results of the Au/ZnO-nanorod catalysts.

| Au/ZnO-nanorod<br>(pretreatment<br>temperature) | XPS Au <sub>4f</sub> and Zn <sub>3p</sub> peak |                         |                          |                                 |
|-------------------------------------------------|------------------------------------------------|-------------------------|--------------------------|---------------------------------|
|                                                 | Au <sup>0</sup> (atom%)                        | Au <sup>+</sup> (atom%) | Au <sup>3+</sup> (atom%) | Au/Zn (surface<br>atomic ratio) |
| 60                                              | 62.3                                           | 14.5                    | 23.2                     | 0.65                            |
| 120                                             | 74.8                                           | 13.3                    | 11.9                     | 0.56                            |
| 200                                             | 74.5                                           | 13.3                    | 12.2                     | 0.52                            |
| 300                                             | 80.6                                           | 14.3                    | 5.1                      | 0.30                            |
| 300-H <sub>2</sub>                              | 97.3                                           | 2.7                     | 0                        | 0.32                            |

The Au/ZnO-nanorod was pretreated under oxygen atmosphere at 60, 120, 200, 300 °C and followed by further pretreatment under hydrogen gas flow at 300 °C.

**Table S2** Contrasts between classical SMSI with that of Au/ZnO.

| SMSI              | Classical SMSI                         | O-SMSI                    | R-SMSI                                                        |
|-------------------|----------------------------------------|---------------------------|---------------------------------------------------------------|
| Treatment         | H <sub>2</sub> -reduction              | O <sub>2</sub> -oxidation | H <sub>2</sub> -reduction                                     |
| Adsorption        | reduced H <sub>2</sub> , CO adsorption | reduced CO adsorption     | reduced CO adsorption                                         |
| Encapsulation     | Yes, T > Ti                            | Yes, T > Ti               | No, alloy, epitaxial interaction and sinking into the support |
| Activity          | T > Ti, reduced activity               | T > Ti, reduced activity  | T > Ti, reduced activity                                      |
| Electron transfer | substrate-to-metal                     | metal-to-substrate        | substrate-to-metal                                            |
| Reversibility     | Yes                                    | Yes                       | Yes                                                           |
